# Supplementary material for: High-Performance γ-Al2O3 Multichannel Tube-Type Tight Ultrafiltration Membrane Using a Modified Sol-Gel Method
Source: MDPI journal article supplement (doi:10.3390/membranes13040405), 2023-04-03
Supplement: s1 [file s1]

## S1. Chemical reaction of the boehmite sol

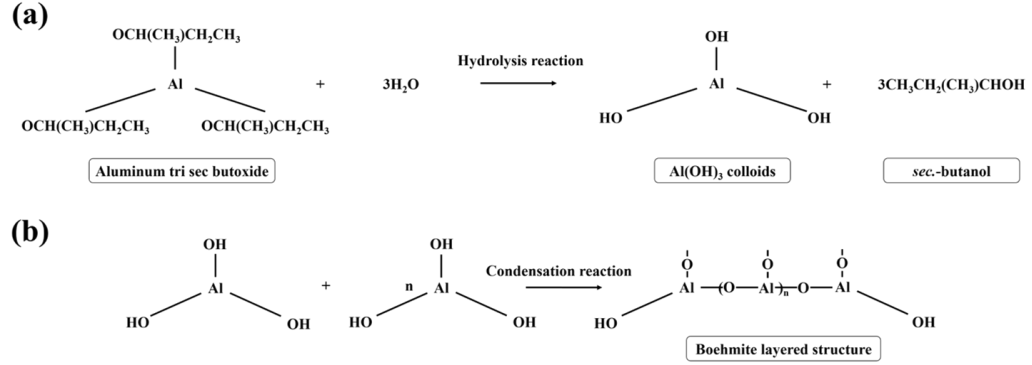

**Figure S1.** Sol-gel reaction of the boehmite, (a) hydrolysis, and (b) poly-condensation.

## S2. Formation of membrane layer

### S2.1 Mathematical model

Gu et al.[1] described the formation of a membrane layer on a porous substrate using the following model (S1):

$$L_m = 2 \left( \frac{\varepsilon_s \gamma K_m}{\eta \alpha R} t \right)^{1/2} \quad (\text{S1})$$

where  $L_m$  is the membrane thickness,  $\varepsilon_s$  is the porosity of the substrate,  $\gamma$  is the surface tension of the liquid solution,  $K_m$  is the permeability of the formed membrane,  $\eta$  is the viscosity of the solution,  $\alpha$  is the ratio of the particle concentration in the solution to that in the wet membrane,  $R$  is the pore radius of the substrate, and  $t$  is the dip-coating time.

### S2.2. Effect of PVA concentration on surface area

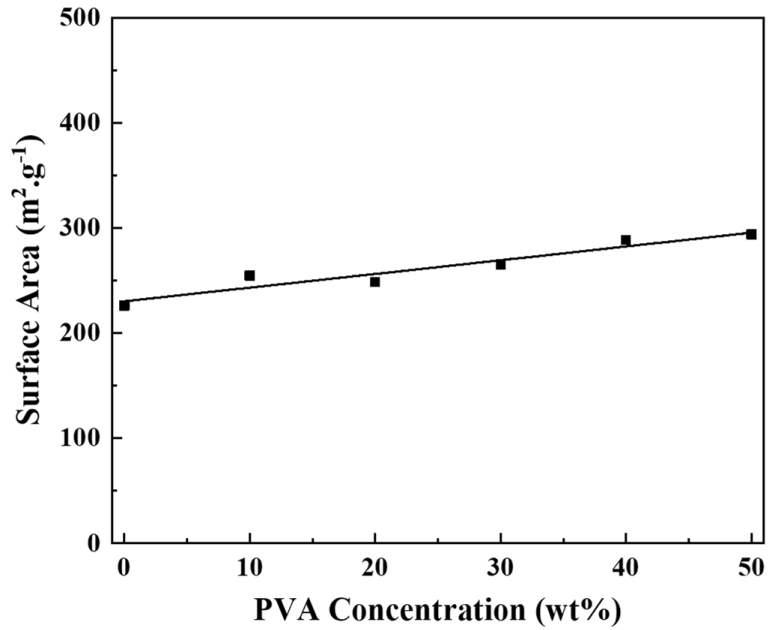

**Figure S2.** Schematic presentation of surface area of unsupported  $\gamma$ -Al<sub>2</sub>O<sub>3</sub> membrane A and PVA concentration in boehmite sol.

### S3. Calculation of permeate flux

Hagen-Poiseuille model[2] described the effects of membrane thickness, pore size, and porosity on the permeate flux using the following equation (S2):

$$j = \frac{\Delta P d_m^2 \varepsilon}{32 \mu L \tau} \quad (S2)$$

where  $j$  is the pure water flux,  $\Delta P$  is the transmembrane pressure,  $d_m$  is the pore diameter,  $\varepsilon$  is the membrane porosity,  $\mu$  is the liquid viscosity,  $L$  is the membrane thickness, and  $\tau$  is the tortuosity of the membrane.

### References

- [1] Y. Gu and G. Meng, "A model for ceramic membrane formation by dip-coating," *J. Eur. Ceram. Soc.*, vol. 19, no. 11, pp. 1961–1966, 1999, doi: 10.1016/s0955-2219(99)00013-8.
- [2] P. Marchetti, A. Butté, and A. G. Livingston, "An improved phenomenological model for prediction of solvent permeation through ceramic NF and UF membranes," *J. Memb. Sci.*, vol. 415–416, no. December, pp. 444–458, 2012, doi: 10.1016/j.memsci.2012.05.030.
